# Supplementary material for: VRK1 Phosphorylates Tip60/KAT5 and Is Required for H4K16 Acetylation in Response to DNA Damage
Source: MDPI journal article supplement (doi:10.3390/cancers12102986), 2020-10-15

# Supplementary file original gels

**Fig. 1A**

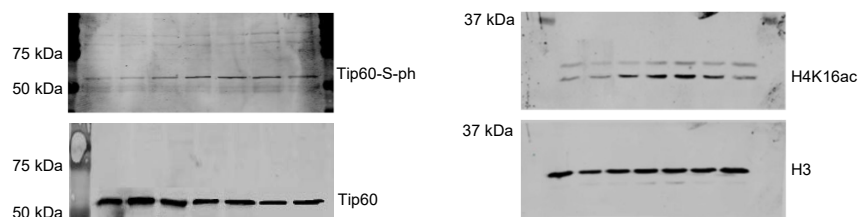

**Fig. 2B**

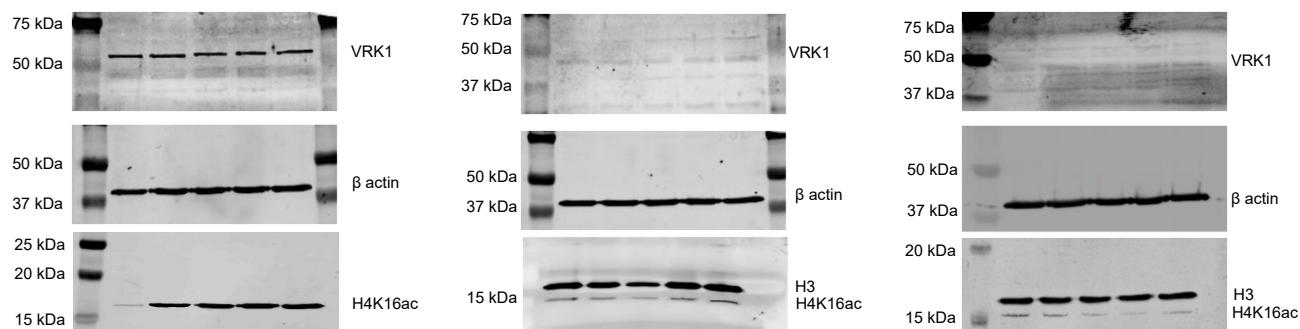

**Fig. 2C**

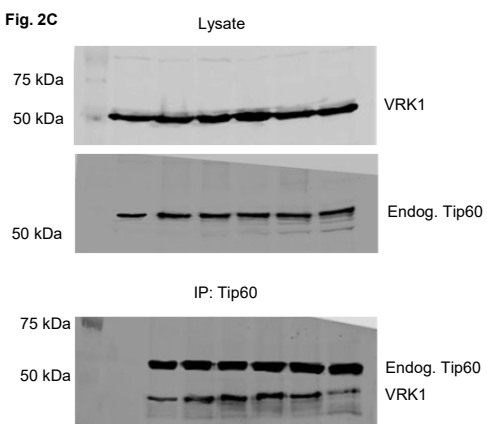

**Fig. 3B**

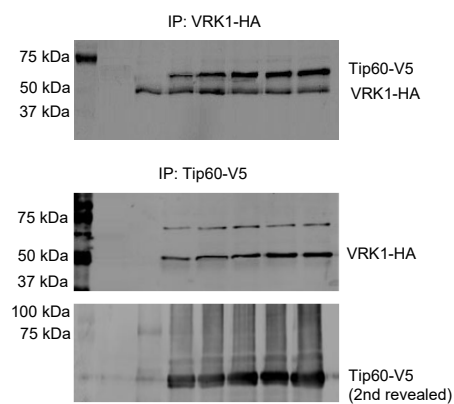

**Fig. 4A**

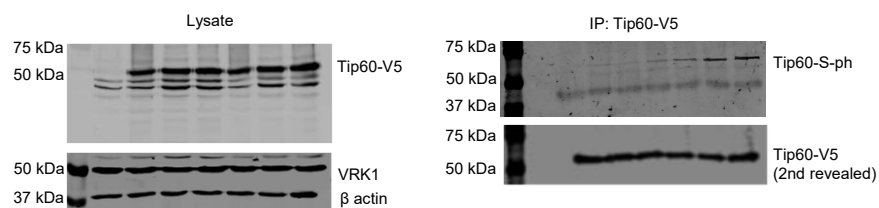

# Supplementary file original gels

Fig. 4B

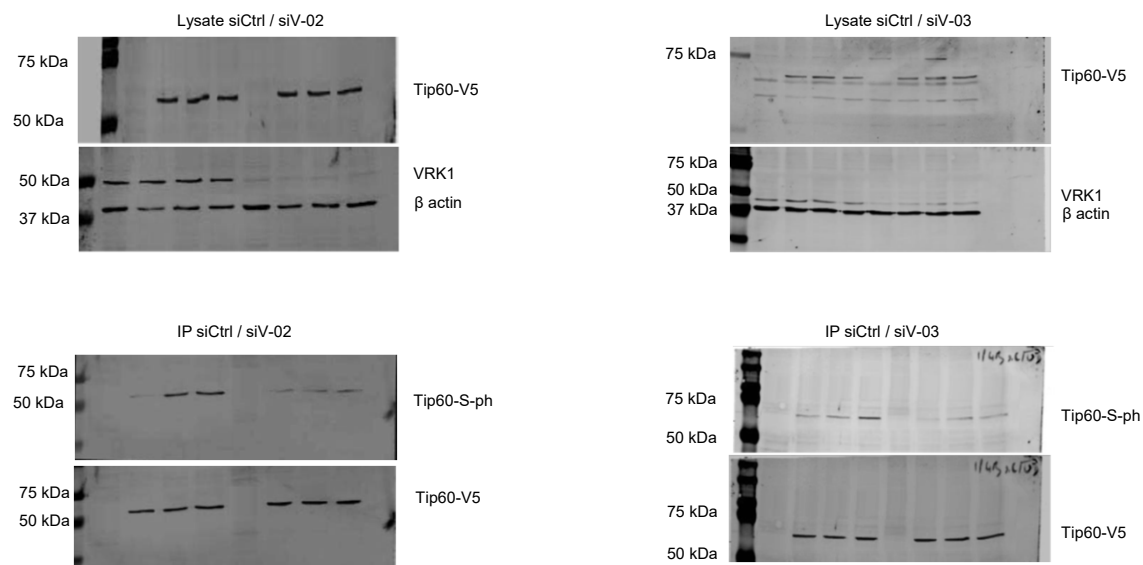

Fig. 4C

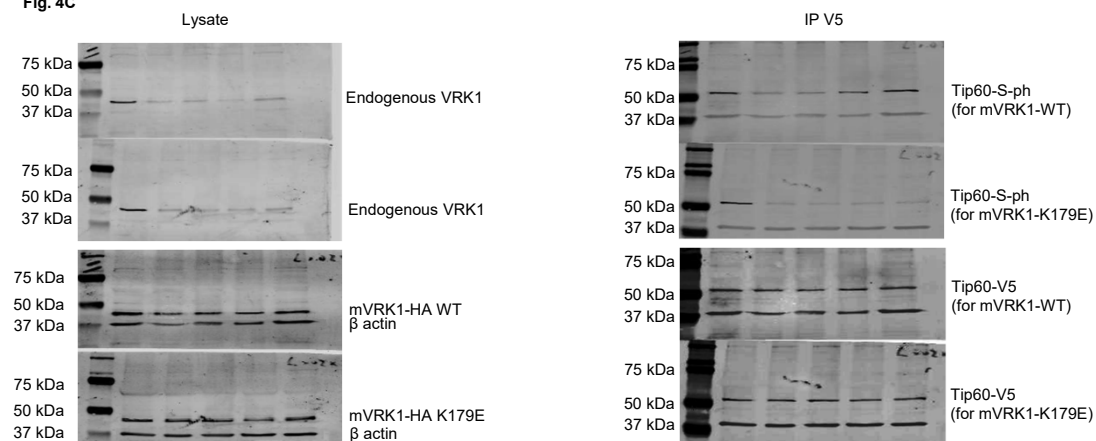

# Supplementary file original gels

**Fig. 5B**

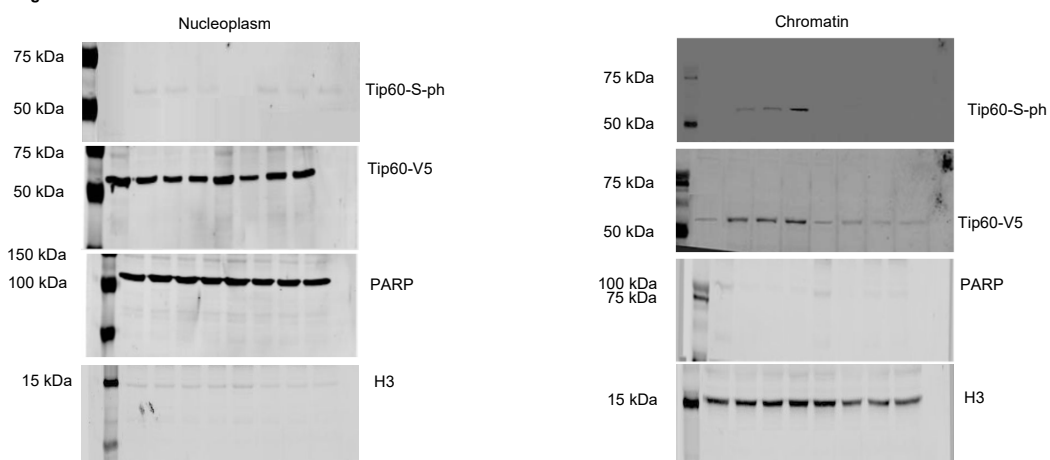

**Fig. 6B**

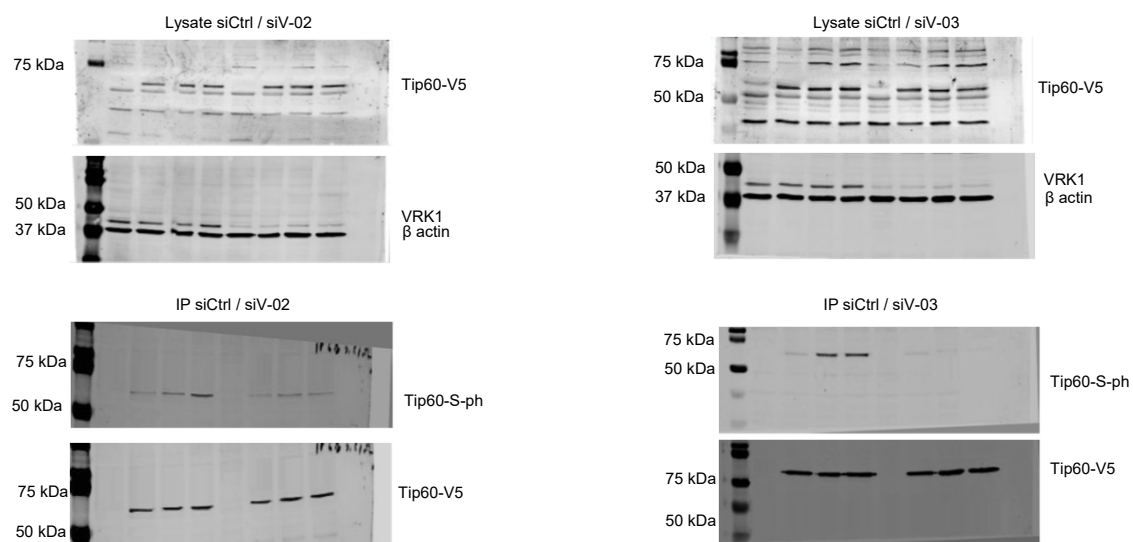

**Fig. 7A**

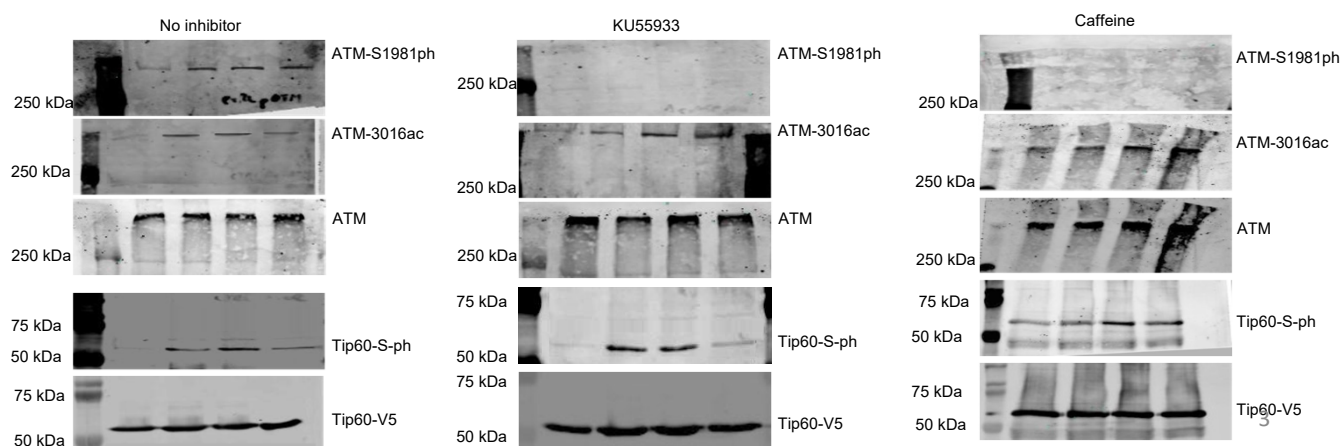

# Supplementary file original gels

**Fig. 7B**

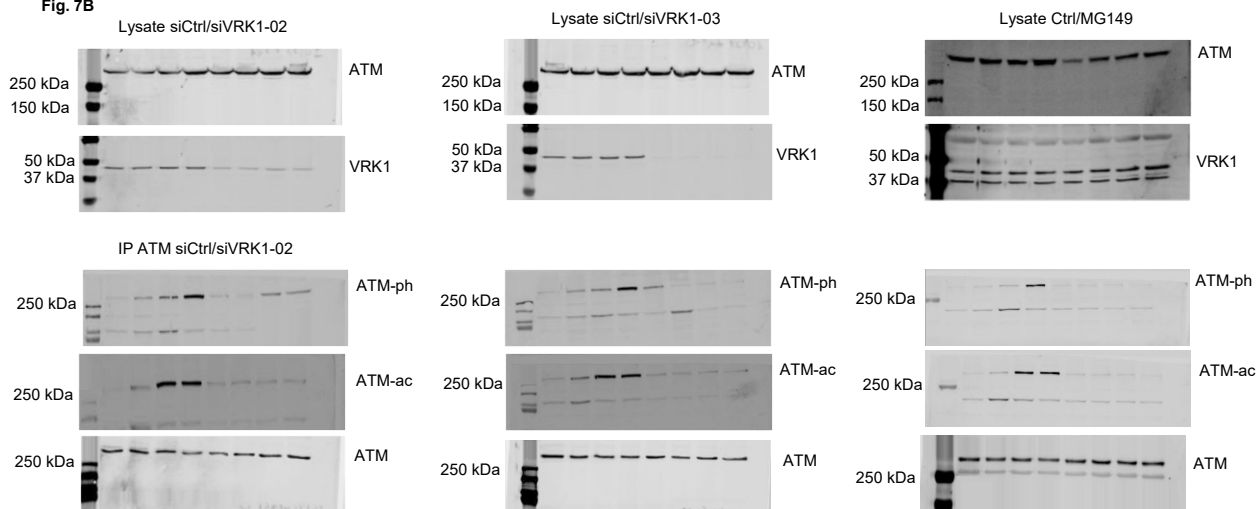

**Fig. 7C**

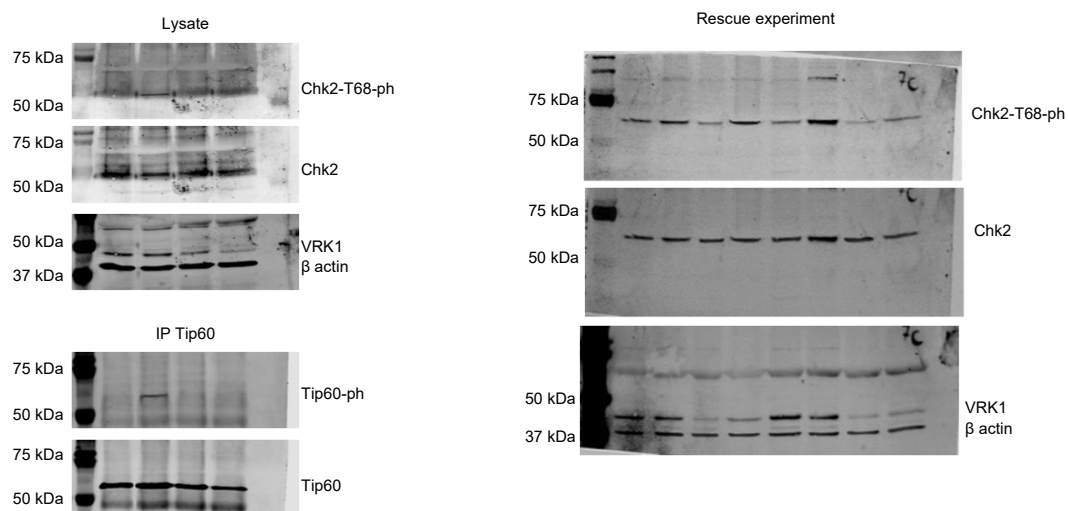

**Fig. 9A**

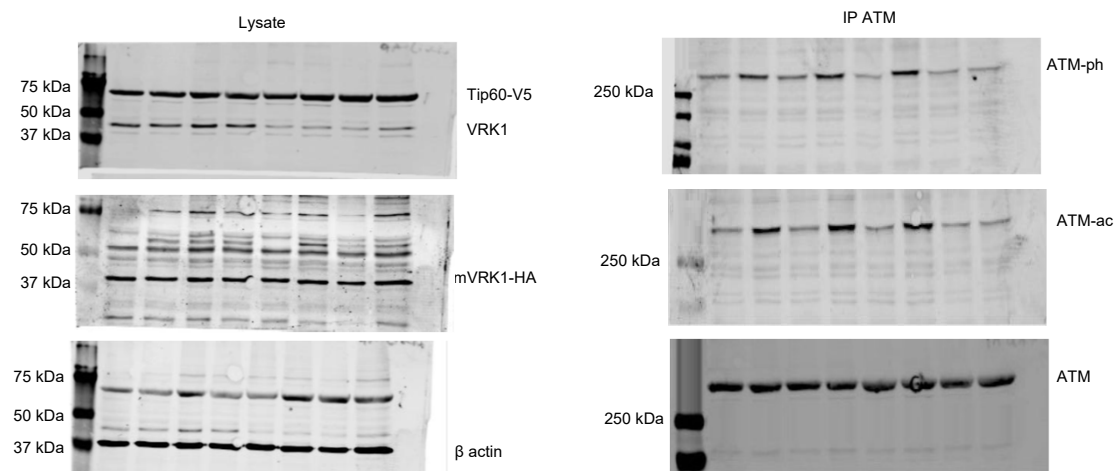

Supplement: s1 [file s1]
